# Supplementary material for: Magnetite (Fe3O4) nanocrystals affect the expression of genes involved in the TGF-beta signalling pathway
Source: Royal Society of Chemistry journal article supplement (doi:10.1039/c0mb00192a), 2011-02-19
Supplement: c0mb00192a.pdf [file c0mb00192a.pdf]

## Supporting Information

### Magnetite (Fe<sub>3</sub>O<sub>4</sub>) Nanocrystals Affect The Expression of Genes Involved in TGF-beta Signaling Pathway

*Jameel Ahmad Khan<sup>a, d</sup>, Tarun Kumar Mandal<sup>b</sup>, Taposh Kumar Das<sup>c</sup>, Yogendra Singh<sup>a</sup>,*

*Beena Pillai<sup>a\*</sup> and Souvik Maiti<sup>a\*</sup>*

<sup>a</sup>Institute of Genomics and Integrative Biology, CSIR, Mall Road, New Delhi 110007,

<sup>b</sup>Polymer Chemistry Division, Indian Associations for the Cultivation of Science, Kolkata,

India 700032,

<sup>c</sup>Department of Anatomy, All India Institute of Medical Sciences, Delhi-110 029, India

<sup>d</sup>Present address: Institute of Pharmacology, University of Marburg, Karl-von-Frisch-Str. 1,

35032 Marburg, Germany

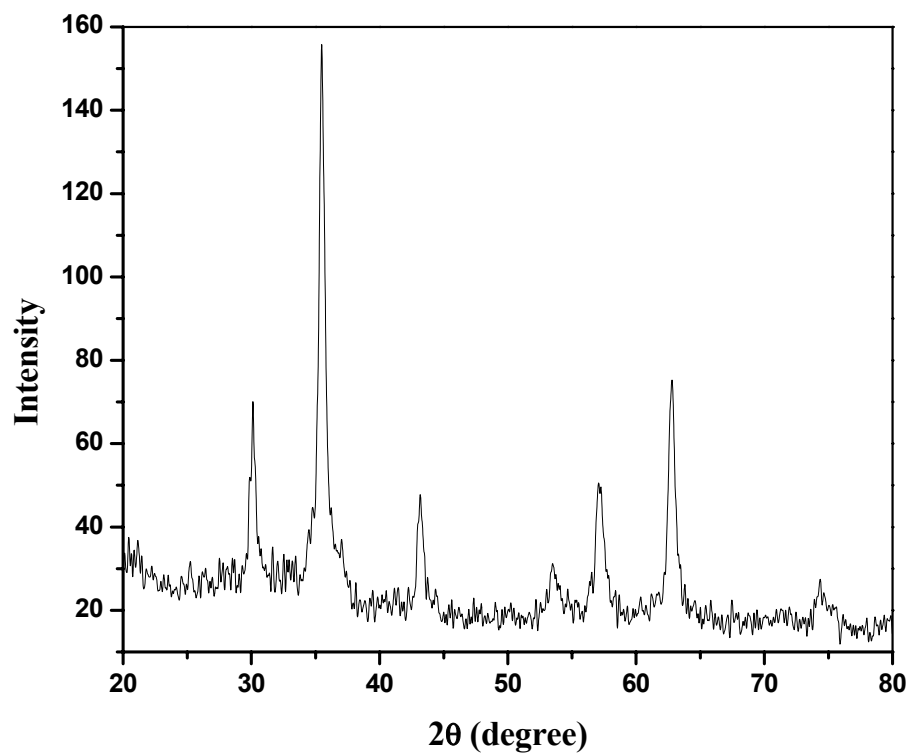

**Figure SI.1:** X-ray diffraction pattern of naked magnetite nanocrystals

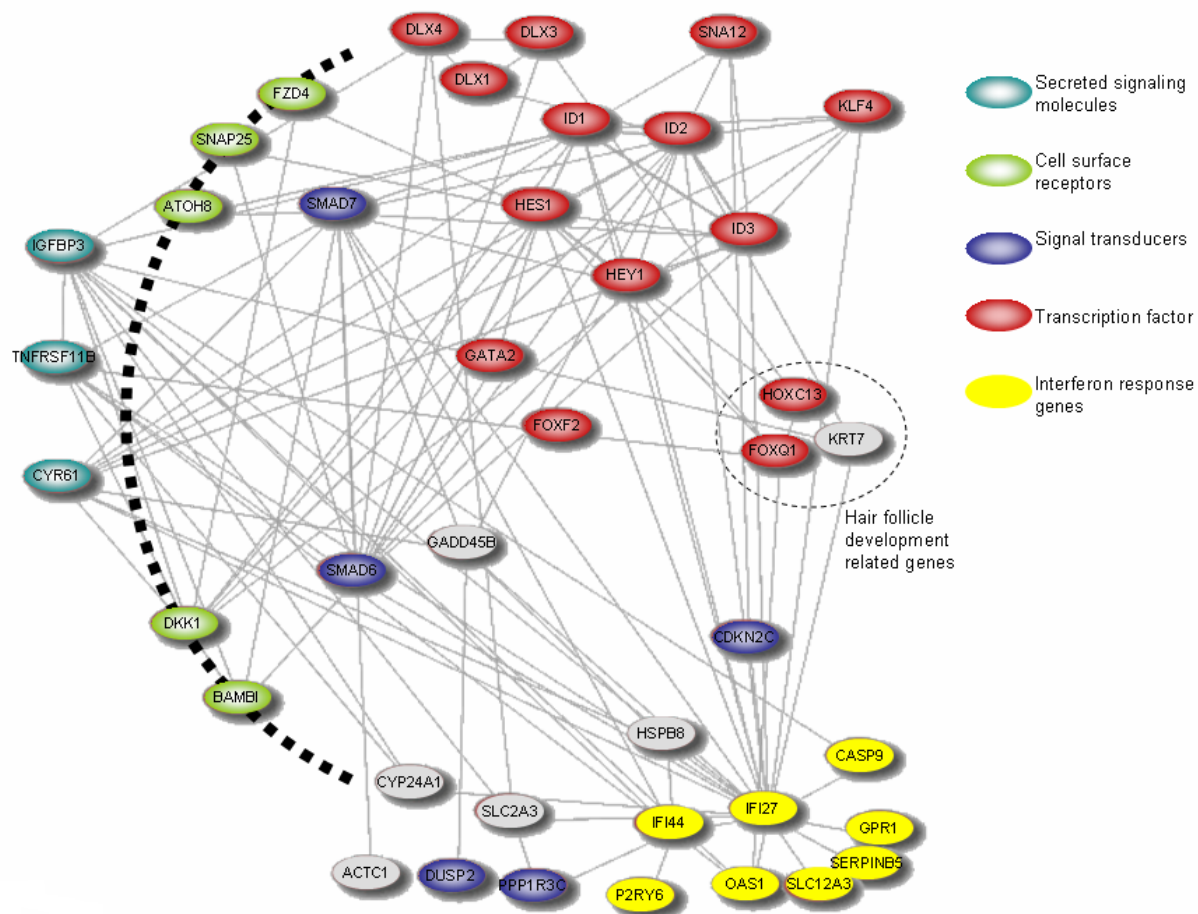

**Figure SI.2:** Gene Interaction network based on co-occurrence of genes in published literature: The list of 69 differentially expressed genes (supplementary Table SI.2) was cut down to 67 genes since two of the genes did not have any traceable gene name/annotation associated with them. The list of genes was used to search literature, using Pubgene software, and color coded according to molecular function. Genes that did not fall into major classes were marked grey. Three genes involved in hair follicle development are encircled by dashed line. The thick dotted line connecting cell surface receptors represents cell membrane. Thin grey lines connect genes with at least one instance of co-occurrence in literature.

**Table SI.1:** Sequences of the primers for Real Time PCR Experiments

| Gene  | Primer | Sequence                  |
|-------|--------|---------------------------|
| ID1   | FP     | CTACGACATGAACGGCTGTTACTC  |
|       | RP     | CTTGCTCACCTTGCGGTTCT      |
| ID2   | FP     | TCAGCCTGCATCACCAGAGA      |
|       | RP     | CTGCAAGGACAGGATGCTGATA    |
| ID3   | FP     | TCAGCTTAGCCAGGTGGAAATC    |
|       | RP     | TGGCTCGGCCAGGACTAC        |
| SMAD6 | FP     | TCTCCTCGCGACGAGTACAAG     |
|       | RP     | GGAGCAGTGATGAGGGAGTTG     |
| SMAD7 | FP     | AGAGGCTGTGTTGCTGTGAATC    |
|       | RP     | GCAGAGTCGGCTAAGGTGATG     |
| B2M   | FP     | TGCTGTCTCCATGTTTGATGTATCT |
|       | RP     | TCTCTGCTCCCCACCTCTAAGT    |

**Table SI.2: Differentially expressed Genes in MNC treated cells with p-value < 0.05.**

| Accession No. | Symbol    | Definition                                                                                                                        | Diff Pval | Fold Change |
|---------------|-----------|-----------------------------------------------------------------------------------------------------------------------------------|-----------|-------------|
| NM_004418.2   | DUSP2     | Homo sapiens dual specificity phosphatase 2 (DUSP2), mRNA.                                                                        | 4.90E-20  | 0.113844    |
| NM_002166.4   | ID2       | Homo sapiens inhibitor of DNA binding 2, dominant negative helix-loop-helix protein (ID2), mRNA.                                  | 3.26E-19  | 0.160793    |
| NM_194286.2   | KIAA1853  | Homo sapiens KIAA1853 (KIAA1853), mRNA.                                                                                           | 5.11E-19  | 0.142492    |
| NM_181353.1   | ID1       | Homo sapiens inhibitor of DNA binding 1, dominant negative helix-loop-helix protein (ID1), transcript variant 2, mRNA.            | 2.09E-17  | 0.224446    |
| NM_005159.3   | ACTC      | Homo sapiens actin, alpha, cardiac muscle (ACTC), mRNA.                                                                           | 3.79E-17  | 0.200464    |
| NM_005220.2   | DLX3      | Homo sapiens distal-less homeobox 3 (DLX3), mRNA.                                                                                 | 1.56E-16  | 0.108622    |
| NM_152486.2   | SAMD11    | Homo sapiens sterile alpha motif domain containing 11 (SAMD11), mRNA.                                                             | 3.64E-15  | 0.253359    |
| NM_005585.2   | SMAD6     | Homo sapiens SMAD, mothers against DPP homolog 6 (Drosophila) (SMAD6), mRNA.                                                      | 6.07E-15  | 0.252655    |
| NM_032827.3   | ATOH8     | Homo sapiens atonal homolog 8 (Drosophila) (ATOH8), mRNA.                                                                         | 2.25E-12  | 0.26244     |
| NM_033260.2   | FOXQ1     | Homo sapiens forkhead box Q1 (FOXQ1), mRNA.                                                                                       | 3.73E-12  | 0.314029    |
| NM_015419.1   | MXRA5     | Homo sapiens matrix-remodelling associated 5 (MXRA5), mRNA.                                                                       | 2.54E-10  | 0.305755    |
| NM_032638.3   | GATA2     | Homo sapiens GATA binding protein 2 (GATA2), mRNA.                                                                                | 9.36E-10  | 0.362878    |
| NM_022165.2   | LIN7B     | Homo sapiens lin-7 homolog B (C. elegans) (LIN7B), mRNA.                                                                          | 6.07E-08  | 0.37653     |
| NM_002167.2   | ID3       | Homo sapiens inhibitor of DNA binding 3, dominant negative helix-loop-helix protein (ID3), mRNA.                                  | 1.42E-07  | 0.439205    |
| NM_000782.3   | CYP24A1   | Homo sapiens cytochrome P450, family 24, subfamily A, polypeptide 1 (CYP24A1), nuclear gene encoding mitochondrial protein, mRNA. | 2.25E-07  | 0.224381    |
| NM_002546.2   | TNFRSF11B | Homo sapiens tumor necrosis factor receptor superfamily, member 11b (osteoprotegerin) (TNFRSF11B), mRNA.                          | 4.91E-07  | 0.32991     |
| NM_014365.2   | HSPB8     | Homo sapiens heat shock 22kDa protein 8 (HSPB8), mRNA.                                                                            | 5.71E-07  | 0.391759    |
| NM_032867.1   | MICALCL   | Homo sapiens MICAL C-terminal like (MICALCL), mRNA.                                                                               | 9.69E-07  | 0.2252      |
| NM_014899.2   | RHOBTB3   | Homo sapiens Rho-related BTB domain containing 3 (RHOBTB3), mRNA.                                                                 | 1.15E-06  | 0.453833    |
| NM_000142.2   | FGFR3     | Homo sapiens fibroblast growth factor receptor 3 (achondroplasia, thanatophoric dwarfism) (FGFR3), transcript variant 1, mRNA.    | 1.84E-06  | 0.299151    |

| Accession No. | Symbol    | Definition                                                                                          | Diff Pval | Fold Change |
|---------------|-----------|-----------------------------------------------------------------------------------------------------|-----------|-------------|
| NM_005904.2   | SMAD7     | Homo sapiens SMAD, mothers against DPP homolog 7 (Drosophila) (SMAD7), mRNA.                        | 1.87E-06  | 0.432974    |
| NM_001452.1   | FOXF2     | Homo sapiens forkhead box F2 (FOXF2), mRNA.                                                         | 1.87E-06  | 0.45895     |
| NM_000339.1   | SLC12A3   | Homo sapiens solute carrier family 12 (sodium/chloride transporters), member 3 (SLC12A3), mRNA.     | 1.87E-06  | 0.459448    |
| NM_003068.3   | SNAI2     | Homo sapiens snail homolog 2 (Drosophila) (SNAI2), mRNA.                                            | 5.12E-06  | 0.356594    |
| NM_006869.1   | CENTA1    | Homo sapiens centaurin, alpha 1 (CENTA1), mRNA.                                                     | 1.31E-05  | 0.226087    |
| NM_181726.1   | ANKRD37   | Homo sapiens ankyrin repeat domain 37 (ANKRD37), mRNA.                                              | 1.75E-05  | 0.485657    |
| NM_004753.4   | DHRS3     | Homo sapiens dehydrogenase/reductase (SDR family) member 3 (DHRS3), mRNA.                           | 2.33E-05  | 0.437411    |
| NM_005532.3   | IFI27     | Homo sapiens interferon, alpha-inducible protein 27 (IFI27), mRNA.                                  | 5.51E-05  | 0.501769    |
| NM_178120.3   | DLX1      | Homo sapiens distal-less homeo box 1 (DLX1), mRNA.                                                  | 7.54E-05  | 0.481572    |
| NM_012258.2   | HEY1      | Homo sapiens hairy/enhancer-of-split related with YRPW motif 1 (HEY1), mRNA.                        | 8.05E-05  | 0.331584    |
| NM_176797.1   | P2RY6     | Homo sapiens pyrimidinergic receptor P2Y, G-protein coupled, 6 (P2RY6), transcript variant 1, mRNA. | 0.00013   | 1.69846     |
| NM_181712.2   | ANKRD38   | Homo sapiens ankyrin repeat domain 38 (ANKRD38), mRNA.                                              | 0.00013   | 0.455382    |
| NM_173362.2   | LOC317671 | Homo sapiens LOC317671 (LOC317671), mRNA.                                                           | 0.000239  | 0.506275    |
| NM_024554.2   | PGBD5     | Homo sapiens piggyBac transposable element derived 5 (PGBD5), mRNA.                                 | 0.000386  | 0.522677    |
| NM_003081.2   | SNAP25    | Homo sapiens synaptosomal-associated protein, 25kDa (SNAP25), transcript variant 1, mRNA.           | 0.000421  | 0.529917    |
| NM_016307.3   | PRRX2     | Homo sapiens paired related homeobox 2 (PRRX2), mRNA.                                               | 0.000569  | 0.436785    |
| NM_012342.2   | BAMBI     | Homo sapiens BMP and activin membrane-bound inhibitor homolog (Xenopus laevis) (BAMBI), mRNA.       | 0.000873  | 0.557372    |
| NM_002304.1   | LFNG      | Homo sapiens lunatic fringe homolog (Drosophila) (LFNG), mRNA.                                      | 0.00161   | 0.558764    |
| NM_000710.2   | BDKRB1    | Homo sapiens bradykinin receptor B1 (BDKRB1), mRNA.                                                 | 0.002094  | 0.510206    |
| XM_376018.3   | KIAA1644  | PREDICTED: Homo sapiens KIAA1644 protein (KIAA1644), mRNA.                                          | 0.002094  | 0.556893    |
| NM_015675.1   | GADD45B   | Homo sapiens growth arrest and DNA-damage-inducible, beta (GADD45B), mRNA.                          | 0.003203  | 0.527743    |
| NM_002639.2   | SERPINB5  | Homo sapiens serpin peptidase inhibitor, clade B (ovalbumin), member 5 (SERPINB5), mRNA.            | 0.003394  | 0.586929    |

| Accession No.  | Symbol   | Definition                                                                                                      | Diff Pval | Fold Change |
|----------------|----------|-----------------------------------------------------------------------------------------------------------------|-----------|-------------|
| NM_001032409.1 | OAS1     | Homo sapiens 2',5'-oligoadenylate synthetase 1, 40/46kDa (OAS1), transcript variant 3, mRNA.                    | 0.003508  | 0.557544    |
| NM_078626.1    | CDKN2C   | Homo sapiens cyclin-dependent kinase inhibitor 2C (p18, inhibits CDK4) (CDKN2C), transcript variant 2, mRNA.    | 0.003697  | 0.578428    |
| NM_017410.2    | HOXC13   | Homo sapiens homeobox C13 (HOXC13), mRNA.                                                                       | 0.004871  | 0.474712    |
| NM_006417.2    | IFI44    | Homo sapiens interferon-induced protein 44 (IFI44), mRNA.                                                       | 0.005905  | 0.579062    |
| NM_001554.3    | CYR61    | Homo sapiens cysteine-rich, angiogenic inducer, 61 (CYR61), mRNA.                                               | 0.00616   | 0.583433    |
| NM_025214.1    | CCDC68   | Homo sapiens coiled-coil domain containing 68 (CCDC68), mRNA.                                                   | 0.008176  | 0.465831    |
| NM_005279.2    | GPR1     | Homo sapiens G protein-coupled receptor 1 (GPR1), mRNA.                                                         | 0.009273  | 0.386195    |
| NM_005556.3    | KRT7     | Homo sapiens keratin 7 (KRT7), mRNA.                                                                            | 0.010387  | 0.607844    |
| NM_004669.2    | CLIC3    | Homo sapiens chloride intracellular channel 3 (CLIC3), mRNA.                                                    | 0.011595  | 0.589831    |
| NM_004235.3    | KLF4     | Homo sapiens Kruppel-like factor 4 (gut) (KLF4), mRNA.                                                          | 0.011645  | 0.588791    |
| NM_020734.1    | FAM80B   | Homo sapiens family with sequence similarity 80, member B (FAM80B), mRNA.                                       | 0.011794  | 0.530095    |
| NM_019000.2    | FLJ20152 | Homo sapiens hypothetical protein FLJ20152 (FLJ20152), mRNA.                                                    | 0.014697  | 0.54545     |
| NM_001934.2    | DLX4     | Homo sapiens distal-less homeobox 4 (DLX4), transcript variant 2, mRNA.                                         | 0.015465  | 0.41464     |
| NM_005738.2    | ARL4     | Homo sapiens ADP-ribosylation factor-like 4 (ARL4), transcript variant 1, mRNA.                                 | 0.015601  | 0.523949    |
| BU659183       |          | cl44f11.z1 Hembase; Erythroid Precursor Cells (LCB:cl library) Homo sapiens cDNA clone cl44f11 5, mRNA sequence | 0.016179  | 0.461992    |
| NM_016619.1    | PLAC8    | Homo sapiens placenta-specific 8 (PLAC8), mRNA.                                                                 | 0.016179  | 0.620699    |
| NM_152553.2    | IBRDC1   | Homo sapiens IBR domain containing 1 (IBRDC1), mRNA.                                                            | 0.016179  | 0.56492     |
| NM_012242.2    | DKK1     | Homo sapiens dickkopf homolog 1 (Xenopus laevis) (DKK1), mRNA.                                                  | 0.019385  | 0.470827    |
| NM_015556.1    | SIPA1L1  | Homo sapiens signal-induced proliferation-associated 1 like 1 (SIPA1L1), mRNA.                                  | 0.024069  | 0.584835    |
| NM_001013398.1 | IGFBP3   | Homo sapiens insulin-like growth factor binding protein 3 (IGFBP3), transcript variant 1, mRNA.                 | 0.02729   | 0.62321     |
| NM_001229.2    | CASP9    | Homo sapiens caspase 9, apoptosis-related cysteine peptidase (CASP9), transcript variant alpha, mRNA.           | 0.02764   | 0.56053     |
| BM724647       |          | UI-E-EJ0-ais-e-15-0-UI.r1 UI-E-EJ0 Homo sapiens cDNA clone UI-E-EJ0-ais-e-15-0-UI 5, mRNA sequence              | 0.033027  | 0.537131    |

| Accession No. | Symbol  | Definition                                                                                       | Diff Pval | Fold Change |
|---------------|---------|--------------------------------------------------------------------------------------------------|-----------|-------------|
| NM_006931.1   | SLC2A3  | Homo sapiens solute carrier family 2 (facilitated glucose transporter), member 3 (SLC2A3), mRNA. | 0.033027  | 0.635309    |
| NM_005524.2   | HES1    | Homo sapiens hairy and enhancer of split 1, (Drosophila) (HES1), mRNA.                           | 0.041602  | 0.512536    |
| NM_012193.2   | FZD4    | Homo sapiens frizzled homolog 4 (Drosophila) (FZD4), mRNA.                                       | 0.041602  | 0.566376    |
| NM_005398.3   | PPP1R3C | Homo sapiens protein phosphatase 1, regulatory (inhibitor) subunit 3C (PPP1R3C), mRNA.           | 0.041602  | 0.640479    |
| NM_052943.2   | FAM46B  | Homo sapiens family with sequence similarity 46, member B (FAM46B), mRNA.                        | 0.042424  | 0.613257    |

**Table SI.3: Molecular Function GO Categories with statistically significant ( $p$ -value < 0.05) enrichment in differentially expressed genes identified by *OntoExpress*.**

| GO ID      | Function Name                                                                      | Genes Names                                                                                    | No of genes | Total No. of Ref Genes | Corrected P-Value |
|------------|------------------------------------------------------------------------------------|------------------------------------------------------------------------------------------------|-------------|------------------------|-------------------|
| GO:0003700 | Transcription factor activity                                                      | HOXC13, HEY1, FOXQ1, GATA2, PRRX2, DLX4, DLX3, DLX1, FOXF2, SMAD7, SMAD6, KLF4                 | 12          | 884                    | 0.000556          |
| GO:0030617 | Transforming growth factor beta receptor, inhibitory cytoplasmic mediator activity | SMAD7, SMAD6                                                                                   | 2           | 2                      | 0.000633          |
| GO:0030528 | transcription regulator activity                                                   | HEY1, ATOH8, ID3, ID2, ID1                                                                     | 5           | 114                    | 0.000796          |
| GO:0043565 | Sequence-specific DNA binding                                                      | HOXC13, FOXQ1, GATA2, PRRX2, DLX4, DLX3, DLX1, FOXF2                                           | 8           | 476                    | 0.001643          |
| null       | UnknownF                                                                           | PGBD5, KIAA1853, BAMBI, FAM46B, CCDC68, FAM134B, MICALCL, ANKRD37, PLAC8, IFI44, SAMD11, KANK4 | 13          | 9808                   | 0.019029          |
| GO:0005520 | Insulin-like growth factor binding                                                 | CYR61, IGFBP3                                                                                  | 2           | 21                     | 0.042908          |

**Table SI.4: Summary of Pathway Analysis of differentially expressed Genes**

| <b>Rank</b> | <b>Pathway Name</b>                       | <b>Impact Factor</b> | <b>Total No of Genes in Pathway</b> | <b>No of Diff. Expressed Genes in Pathway</b> | <b>Corrected p-value</b> |
|-------------|-------------------------------------------|----------------------|-------------------------------------|-----------------------------------------------|--------------------------|
| 1           | TGF-beta signaling pathway                | 13.557               | 89                                  | 5                                             | 4.1667E-06               |
| 2           | p53 signaling pathway                     | 12.187               | 68                                  | 4                                             | 3.3893E-05               |
| 3           | Basal cell carcinoma                      | 8.147                | 55                                  | 1                                             | 0.13757436               |
| 4           | Maturity onset diabetes of the young      | 7.056                | 25                                  | 1                                             | 0.06250493               |
| 5           | Regulation of actin cytoskeleton          | 6.754                | 211                                 | 2                                             | 0.10588244               |
| 6           | Apoptosis                                 | 6.173                | 84                                  | 1                                             | 0.2024254                |
| 7           | Calcium signaling pathway                 | 5.429                | 175                                 | 1                                             | 0.37291402               |
| 8           | Wnt signaling pathway                     | 5.117                | 148                                 | 2                                             | 0.06012291               |
| 9           | Cell cycle                                | 5.088                | 112                                 | 2                                             | 0.03651655               |
| 10          | Colorectal cancer                         | 5.067                | 84                                  | 2                                             | 0.02148037               |
| 11          | Bladder cancer                            | 4.759                | 42                                  | 1                                             | 0.10684315               |
| 12          | Melanogenesis                             | 4.638                | 101                                 | 1                                             | 0.23818297               |
| 13          | MAPK signaling pathway                    | 4.551                | 265                                 | 3                                             | 0.03348438               |
| 14          | Neuroactive ligand-receptor interaction   | 4.328                | 254                                 | 2                                             | 0.14601322               |
| 15          | Insulin signaling pathway                 | 3.554                | 138                                 | 1                                             | 0.30877404               |
| 16          | SNARE interactions in vesicular transport | 3.536                | 38                                  | 1                                             | 0.09229818               |
| 17          | Notch signaling pathway                   | 3.266                | 46                                  | 1                                             | 0.11641201               |
| 18          | Endometrial cancer                        | 3.256                | 52                                  | 1                                             | 0.13057631               |
| 19          | Non-small cell lung cancer                | 3.221                | 54                                  | 1                                             | 0.13524786               |
| 20          | VEGF signaling pathway                    | 2.982                | 71                                  | 1                                             | 0.17174101               |
| 21          | Pancreatic cancer                         | 2.944                | 73                                  | 1                                             | 0.17841261               |
| 22          | Complement and coagulation cascades       | 2.899                | 69                                  | 1                                             | 0.16726367               |
| 23          | Small cell lung cancer                    | 2.786                | 87                                  | 1                                             | 0.20885349               |
| 24          | Prostate cancer                           | 2.776                | 89                                  | 1                                             | 0.21098483               |
| 25          | Cell Communication                        | 2.504                | 138                                 | 1                                             | 0.3069031                |
| 26          | Adherens junction                         | 2.475                | 75                                  | 1                                             | 0.18283091               |
| 27          | Vibrio cholerae infection                 | 2.387                | 59                                  | 1                                             | 0.14220888               |
| 28          | Cytokine-cytokine receptor interaction    | 1.413                | 259                                 | 1                                             | 0.49929734               |
